# Supplementary material for: Macro- and Micro-Structural Cerebellar and Cortical Characteristics of Cognitive Empathy Towards Fictional Characters in Healthy Individuals
Source: Research Square preprint supplement (doi:10.21203/rs.3.rs-115962/v1), 2020-12-08
Supplement: Supplementary file 2 [file da789c21969cf694fd9ea7e4.docx]

**Table 2| Regional gray matter Volumes (ROI-based and Voxel Based Morphometry analyses) and Fantasy IRI subscale**

| **Label for peak** | **Side** | **Extent (n voxels)** | **t** | ***p*** | **equivZ** | **x,y,z (mm)** |
| --- | --- | --- | --- | --- | --- | --- |
| **ROI-based** |  |  |  |  |  |  |
| Cerebellum Crus 2 | R | 1272 | 3.85 | **0.010** | 3.65 | 42, -76, -36 |
| Inferior Frontal Gyrus, Pars Triangularis | R | 61 | 4.25 | **0.025** | 3.99 | 42, 33, 3 |
| **Voxel Based Morphometry** |  |  |  |  |  |  |
| Cerebellum Crus 2 | R | 1734 | 3.93 | **0.002** | 3.72 | 44, -76, -38 |

Abbreviations:

*Results are FWE corrected*.

*p*= significance (FWE corrected) at the cluster level (Cerebellum Crus 2) and at the peak level (Inferior Frontal Gyrus, Pars Triangularis)

L= left

R= right

Coordinates are in Montreal Neurological Institute (MNI) space.
